# Supplementary material for: Transcriptome-Wide Analysis of UTRs in Non-Small Cell Lung Cancer Reveals Cancer-Related Genes with SNV-Induced Changes on RNA Secondary Structure and miRNA Target Sites
Source: PLoS One. 2014 Jan 8;9(1):e82699. doi: 10.1371/journal.pone.0082699 (PMC3885406; doi:10.1371/journal.pone.0082699)
Supplement: File S3 — RNAsnp predicted effect of SNPs in LD with disruptive SNVs. (XLSX) [file pone.0082699.s007.xlsx]

## Sheet: tableS2
Gene	mRNA_RefSeqId	UTR	SNV-SNP	RNAsnp(p-value)	RNAsnp(measure)	% overlap of predicted local region with conserved RNA secondary structure	Program used to predict conserver RNA secondary structure	dbSNP id	Cancer-associated
SNPs in linkage disequillibrium which does not cause significant structural effect
FARP1	NM_005766	UTR3	G4329C-C4486A	0.2705	dmax	NA	NA	rs9584850-rs9168	no
FARP1	NM_005766	UTR3	G4329C-C4486A	0.2735	rmin	NA	NA	rs9584850-rs9168	no
MAX	NM_002382	UTR3	C1057U-G1218A	0.4412	dmax	NA	NA	rs4902359-rs1957948	yes
MAX	NM_002382	UTR3	C1057U-G1218A	0.6178	rmin	NA	NA	rs4902359-rs1957948	yes
MAX	NM_002382	UTR3	C1057U-G1240A	0.4235	rmin	NA	NA	rs4902359-rs1957949	yes
MAX	NM_002382	UTR3	C1057U-G1240A	0.6349	dmax	NA	NA	rs4902359-rs1957949	yes
PAN3	NM_175854	UTR3	C3337U-C3402U	0.1818	dmax	NA	NA	rs9554309-rs11619230	no
PAN3	NM_175854	UTR3	C3337U-C3402U	0.4088	rmin	NA	NA	rs9554309-rs11619230	no
SLC35B2	NM_178148	UTR3	C1769U-C1831U	0.6949	dmax	NA	NA	rs3188-rs3187	no
SLC35B2	NM_178148	UTR3	C1769U-C1831U	0.7135	rmin	NA	NA	rs3188-rs3187	no
SNPs in linkage disequillibrium causing significant structural effect
CARHSP1	NM_001042476	3	G1378A-G1382A	0.0096	dmax	NA	NA	rs3785173-rs3785172	no
CARHSP1	NM_001042476	3	G1378A-G1382A	0.0118	rmin	NA	NA	rs3785173-rs3785172	no
CHURC1	NM_001204064	3	A718G-A746G	0.042	dmax	NA	NA	rs8943-rs9281	no
CHURC1	NM_001204064	3	A718G-A746G	0.1367	rmin	NA	NA	rs8943-rs9281	no
CHURC1	NM_001204064	3	A718G-G761A	0.0414	dmax	NA	NA	rs8943-rs8984	no
CHURC1	NM_001204064	3	A718G-G761A	0.1349	rmin	NA	NA	rs8943-rs8984	no
DAPK3	NM_001348	3	G1662U-C1849G	0.0462	rmin	NA	NA	rs3745982-rs10419272	yes
DAPK3	NM_001348	3	G1662U-C1849G	0.0511	dmax	NA	NA	rs3745982-rs10419272	yes
FSTL1	NM_007085	3	C1948U-G2042U	0.0183	rmin	NA	NA	rs12192-rs12173	no
FSTL1	NM_007085	3	C1948U-G2042U	0.1024	dmax	NA	NA	rs12192-rs12173	no
HTT	NM_002111	3	C9948G-C10095U	0.0527	rmin	NA	NA	rs362305-rs362303	yes
HTT	NM_002111	3	C9948G-C10095U	0.1054	dmax	NA	NA	rs362305-rs362303	yes
PRELP	NM_002725	3	U1438A-C1561A	0.033	rmin	NA	NA	rs1050083-rs1166	no
PRELP	NM_002725	3	U1438A-C1561A	0.088	dmax	NA	NA	rs1050083-rs1166	no
SCRN1	NM_001145515	3	U1712G-C1745U	0.0076	rmin	NA	NA	rs10480087-rs10479824	no
SCRN1	NM_001145515	3	U1712G-C1745U	0.062	dmax	NA	NA	rs10480087-rs10479824	no
SCRN1	NM_001145515	3	U1712G-G1893A	0.0091	rmin	NA	NA	rs10480087-rs6976789	no
SCRN1	NM_001145515	3	U1712G-G1893A	0.0508	dmax	NA	NA	rs10480087-rs6976789	no
SRP54	NM_003136	3	G1951A-C1993U	0.0567	dmax	NA	NA	rs28577270-rs11540758	no
SRP54	NM_003136	3	G1951A-C1993U	0.4059	rmin	NA	NA	rs28577270-rs11540758	no
TMEM50B	NM_006134	3	C2124G-C2245U	0.0364	rmin	100	RNAz	rs1044213-rs1044218	no
TMEM50B	NM_006134	3	C2124G-C2245U	0.056	dmax	100	RNAZ	rs1044213-rs1044218	no
USF2	NM_003367	3	C1283U-C1462U	0.0521	rmin	NA	NA	rs1051995-rs1052033	yes
USF2	NM_003367	3	C1283U-C1462U	0.1083	dmax	NA	NA	rs1051995-rs1052033	yes
